# Supplementary material for: Rapid Intraspecific Evolution of miRNA and siRNA Genes in the Mosquito Aedes aegypti
Source: PLoS One. 2012 Sep 21;7(9):e44198. doi: 10.1371/journal.pone.0044198 (PMC3448618; doi:10.1371/journal.pone.0044198)
Supplement: Table S1 — CodeML results for each of the five models for detection of positive selection and each of the six genes. For each gene, the ML model is highlighted in grey. The number of positively selected sites (PSS) identified using the naive empirical Bayes (NEB) and Bayes empirical Bayes (BEB) methods are listed for each gene. l = −log likelihood ratio. The likelihood ratio test was computed between Models M2a and M1a (c2[1 d.f.] = 2ΔL) and between Models M7 and M8 (χ2 [1 d.f.] = 2ΔL) in all 12 comparisons, P<0.0001. (DOCX) [file pone.0044198.s001.docx]

**Table S1:** CodeML results for each of the five models for detection of positive selection and each of the six genes. For each gene, the ML model is highlighted in grey. The number of positively selected sites (PSS) identified using the naive empirical Bayes (NEB) and Bayes empirical Bayes (BEB) methods are listed for each gene. l = - log likelihood ratio. The likelihood ratio test was computed between Models M2a and M1a (**2[1 d.f.] = 2**l ) and between Models M7 and M8 (**2[1 d.f.] = 2**l). In all 12 comparisons, P < 0.0001.

Model(parameters) l p0 p1 p2 p3 p4 p5 p6 p7 p8 p9 p10

w0 w1 w2 w3 w4 w5 w6 w7 w8 w9 w10

Dicer 1

M0(1) -24789.1

M1a(neutral)(2) -23574.7 0.9486 0.0514

0.0017 1.0000

M2a(selection)(4) -23148.4 0.9445 0.0434 0.0121

**PSS:NEB=25;BEB=27** 0.0012 1.0000 8.7917

**2[1 d.f.] = 2**l **=** 852.70

M7(beta)(10) -23599.1 0.1000 0.1000 0.1000 0.1000 0.1000 0.1000 0.1000 0.1000 0.1000 0.1000

0.0000 0.0000 0.0000 0.0000 0.0000 0.0000 0.0000 0.0000 0.0000 1.0000

M8(beta&w)(11) -23179.3 0.0988 0.0988 0.0988 0.0988 0.0988 0.0988 0.0988 0.0988 0.0988 0.0988 0.0120

**PSS:NEB=25;BEB=30** 0.0000 0.0000 0.0000 0.0000 0.0000 0.0000 0.0000 0.0000 0.0000 0.9075 9.0542

**2[2 d.f.] = 2**l **=** 839.54

Dicer 2

M0(1) -14572.6

M1a(neutral)(2) -14030.0 0.9309 0.0691

0.0010 1.0000

M2a(selection)(4) -13812.3 0.9351 0.0466 0.0183

**PSS:NEB=29;BEB=33** 0.0056 1.0000 8.2708

**2[1 d.f.] = 2**l **=** 435.44

M7(beta)(10) -14035.9 0.1000 0.1000 0.1000 0.1000 0.1000 0.1000 0.1000 0.1000 0.1000 0.1000

0.0000 0.0000 0.0000 0.0000 0.0000 0.0000 0.0000 0.0000 0.0000 1.0000

M8(beta&w)(11) -13821.0 0.0978 0.0978 0.0978 0.0978 0.0978 0.0978 0.0978 0.0978 0.0978 0.0978 0.0222

**PSS:NEB=32;BEB=39** 0.0000 0.0000 0.0000 0.0000 0.0000 0.0000 0.0000 0.0000 0.0000 0.4921 7.5031

**2[2 d.f.] = 2**l **=** 429.83

Model(parameters) l p0 p1 p2 p3 p4 p5 p6 p7 p8 p9 p10

w0 w1 w2 w3 w4 w5 w6 w7 w8 w9 w10

Argonaute 1

M0(1) -8233.1

M1a(neutral)(2) -8162.6 0.9951 0.0049

0.0038 1.0000

M2a(selection)(4) -8153.6 0.9961 0.0000 0.0039

**PSS:NEB=3;BEB=3** 0.0041 1.0000 2.5363

**2[1 d.f.] = 2**l **=** 18.00

M7(beta)(10) -8191.4 0.1000 0.1000 0.1000 0.1000 0.1000 0.1000 0.1000 0.1000 0.1000 0.1000

0.0000 0.0000 0.0000 0.0000 0.0000 0.0000 0.0000 0.0000 0.0000 0.1753

M8(beta&w)(11) -8154.2 0.0996 0.0996 0.0996 0.0996 0.0996 0.0996 0.0996 0.0996 0.0996 0.0996 0.0039

**PSS:NEB=3;BEB=3** 0.0000 0.0001 0.0003 0.0007 0.0013 0.0023 0.0036 0.0057 0.0092 0.0176 2.5365

**2[2 d.f.] = 2**l **=** 74.44

Argonaute 2

M0(1) -8926.9

M1a(neutral)(2) -8511.2 0.9073 0.0927

0.0000 1.0000

M2a(selection)(4) -8220.9 0.8911 0.0778 0.0311

**PSS:NEB=29;BEB=33** 0.0000 1.0000 12.9915

**2[1 d.f.] = 2**l **=** 580.61

M7(beta)(10) -8510.4 0.1000 0.1000 0.1000 0.1000 0.1000 0.1000 0.1000 0.1000 0.1000 0.1000

0.0000 0.0000 0.0000 0.0000 0.0000 0.0000 0.0000 0.0000 0.0000 1.0000

M8(beta&w)(11) -8219.4 0.0969 0.0969 0.0969 0.0969 0.0969 0.0969 0.0969 0.0969 0.0969 0.0969 0.0306

**PSS:NEB=29;BEB=38** 0.0000 0.0000 0.0000 0.0000 0.0000 0.0000 0.0000 0.0000 0.0000 1.0000 13.4267

**2[2 d.f.] = 2**l **=** 582.13

Model(parameters) l p0 p1 p2 p3 p4 p5 p6 p7 p8 p9 p10

w0 w1 w2 w3 w4 w5 w6 w7 w8 w9 w10

R3D1

M0(1) -2207.2

M1a(neutral)(2) -2179.1 0.9605 0.0395

0.0000 1.0000

M2a(selection)(4) -2172.4 0.9612 0.0356 0.0032

**PSS:NEB=1;BEB=1**  0.0000 1.0000 12.1247

**2[1 d.f.] = 2**l **=** 13.32

M7(beta)(10) -2184.6 0.1000 0.1000 0.1000 0.1000 0.1000 0.1000 0.1000 0.1000 0.1000 0.1000

0.0000 0.0000 0.0000 0.0000 0.0000 0.0000 0.0000 0.0000 0.0000 0.8835

M8(beta&w)(11) -2172.7 0.0997 0.0997 0.0997 0.0997 0.0997 0.0997 0.0997 0.0997 0.0997 0.0997 0.0032

**PSS:NEB=1;BEB=2**  0.0000 0.0000 0.0000 0.0000 0.0000 0.0000 0.0000 0.0000 0.0000 0.3840 12.0062

**2[2 d.f.] = 2**l **=** 23.83

R2D2

M0(1) -1657.0

M1a(neutral)(2) -1639.4 0.9101 0.0899

0.0000 1.0000

M2a(selection)(4) -1632.2 0.9202 0.0688 0.0111

**PSS:NEB=3;BEB=5** 0.0000 1.0000 11.2220

**2[1 d.f.] = 2**l **=** 14.50

M7(beta)(10) -1642.6 0.1000 0.1000 0.1000 0.1000 0.1000 0.1000 0.1000 0.1000 0.1000 0.1000

0.0000 0.0000 0.0000 0.0000 0.0000 0.0000 0.0000 0.0000 1.0000 1.0000

M8(beta&w)(11) -1632.4 0.0989 0.0989 0.0989 0.0989 0.0989 0.0989 0.0989 0.0989 0.0989 0.0989 0.0111

**PSS:NEB=3;BEB=5** 0.0000 0.0000 0.0000 0.0000 0.0000 0.0000 0.0000 0.0000 0.0000 0.7948 11.5543

**2[2 d.f.] = 2**l **=** 20.29
